# Supplementary material
Source: PubMed Central journal article supplement (PMC6054139)
Supplement: NIHMS980635-supplement-Supp.pdf [file NIHMS980635-supplement-Supp.pdf]

***New Phytologist* Supporting Information**

Article title: **Mutational studies of the Aux/IAA proteins in *Physcomitrella* reveal novel insights into their function**

Authors: S. Tao and M. Estelle

Article acceptance date: 09 January 2018

The following Supporting Information is available for this article:

**Fig. S1** qPCR of the *Aux/IAA* gene expression level in the wild-type moss protonemata.

**Fig. S2** Yeast 2-hybrid analysis of the effects of IAA1a mutations.

**Table S1** Primers used in this study

**Fig. S1** qPCR of the *Aux/IAA* gene expression level in the wild-type moss protonemata treated with mock (-) and 10  $\mu$ M IAA (+). All the three *Aux/IAA* genes encoding the auxin signaling repressors are up-regulated upon auxin treatment, indicating a negative feedback of the signal transduction. Error bars represent SEM. “a” difference between mock and IAA-treated samples is significant at  $p < 0.05$  (Student’s t-test),  $n=4$ .

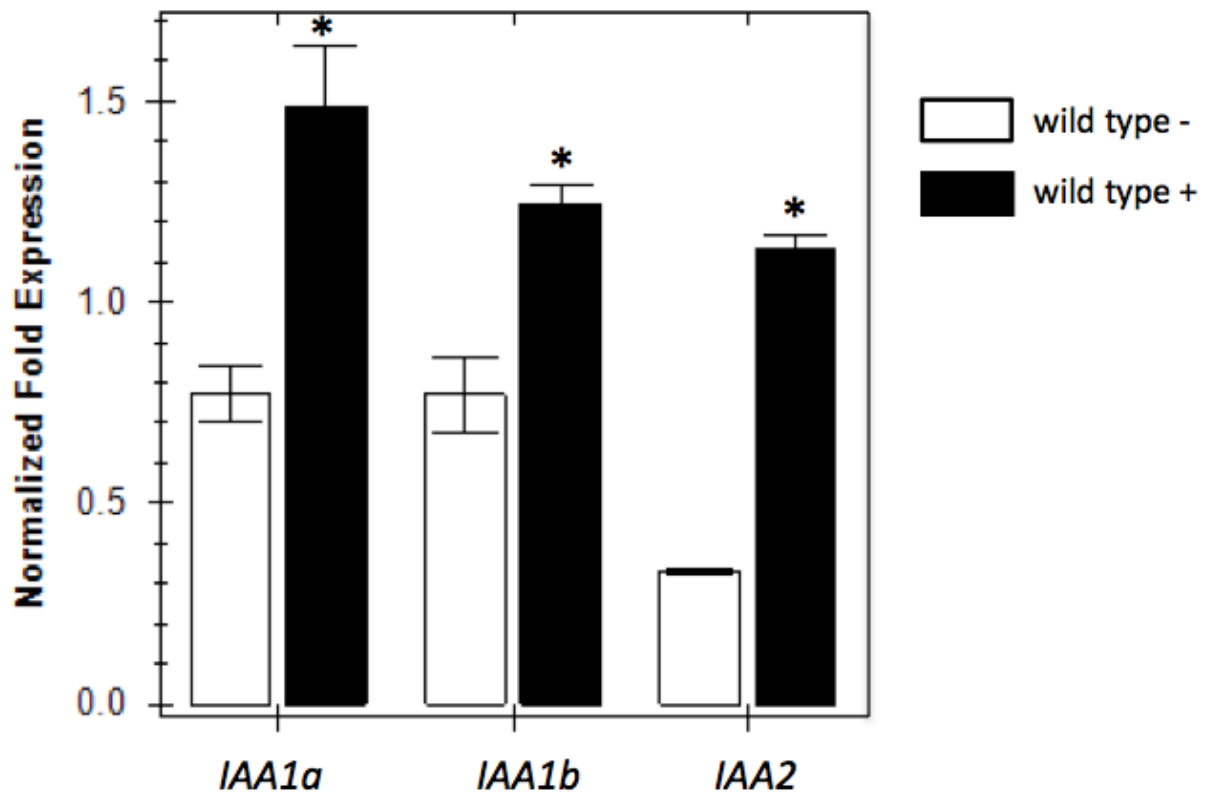

**Fig. S2** Yeast 2-hybrid analysis of the effects of IAA1a mutations on protein interaction. (a) IAA1a<sup>Δear</sup> did not show interaction with the moss TPL1 or TPL2 proteins. (b) K and OPCA mutations disrupted the IAA1a self-interaction and its interaction with moss ARFa8. (c) IAA1a<sup>K362A</sup> did not show self-interaction but still interacted with proteins that had intact PBI domain like ARFa8 and IAA1a. EV: empty vector expressing only the Y2H DNA-binding domain or activation domain.

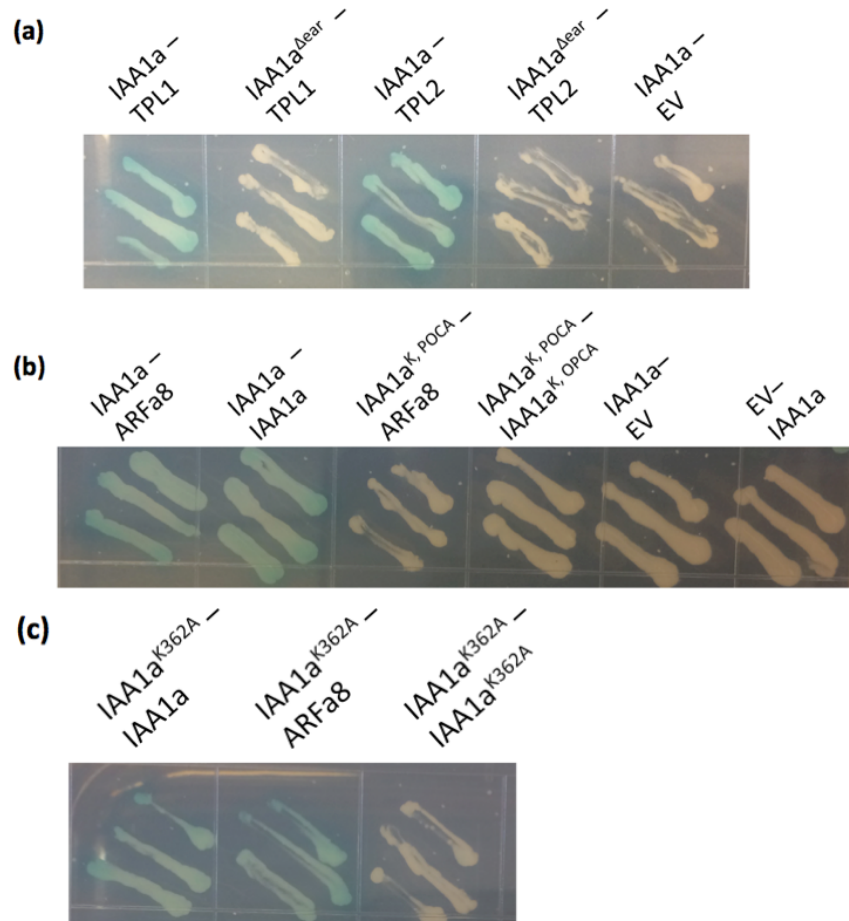

**Table S1** Primers used in this study

| Primer name            | Sequence                                   | Usage                                        |
|------------------------|--------------------------------------------|----------------------------------------------|
| PstI-Luc-F             | CGCGACCTGCAGATGGAAGACGCCAAAAACAT           | Cloning of<br><i>Luciferase</i>              |
| Luc-XbaI-R             | CGTCTGTCTAGATTACACGGCGATCTTTCCG            |                                              |
| PstI-IAA1a-F           | CGCGACCTGCAGATGAACGTCAGCGAAGGTTG           | Cloning of<br><i>IAA1a</i>                   |
| IAA1a-PstI-R           | ATGCCTGCAGCCCCACCGCCACTTGC                 |                                              |
| HindIII-<br>IAA1a5'g-F | ATGCAAGCTTGATTGAAGAGTGGCAGTGGGTG           | Cloning of<br><i>IAA1a</i> 5'<br>genomic DNA |
| IAA1a5'g-<br>HindIII-R | CGTCTGAAGCTTTGAATAATGTCCAACCTTCACTGCTAAAAG |                                              |
| SpeI-IAA1a3'g-F        | CACCACTAGTGGAGATTGCAATGGCGGGATGTGCG        | Cloning of<br><i>IAA1a</i> 3'<br>genomic DNA |
| IAA1a3'g-SpeI-R        | CCACTAGTCGTAAAATACTTACAATCATGAAATCCTTCCC   |                                              |
| K325R-F                | GTGGGTTGGCCACCCGTGAGGAACCTCAACAAGATGAAC    | IAA1aK325R<br>mutagenesis                    |
| K325R-R                | GTTTCATCTTGTGAAAGTTCCTCACGGGTGGCCAACCCAC   |                                              |
| VK-F                   | GTGGGTTGGCCACCCATCGGGAACCTCAACAAGATGAAC    | V324IK325G<br>mutagenesis                    |
| VK-R                   | GTTTCATCTTGTGAAAGTTCCTGATGGGTGGCCAACCCAC   |                                              |
| K326A-F                | CGAGCGGGAACCTTGTGGCGATCTACATGGATGGTGTG     | IAA1aK326A<br>mutagenesis                    |
| K362A-R                | CACACCATCCATGTAGATCGCCACAAGGTTCCCGCTCG     |                                              |
| D435A-F                | GTGTTGATATACGAGGCTCACGAGGGAGACTCG          | IAA1aD435A<br>mutagenesis                    |
| D435A-R                | CGAGTCTCCCTCGTGAGCCTCGTATATCAACAC          |                                              |
| D439A-F                | GGCTCACGAGGGAGCCTCGATGCTGGTCCG             | IAA1aD439A<br>mutagenesis                    |
| D439A-R                | CCGACCAGCATCGAGGCTCCCTCGTGAGCC             |                                              |
| ear-F1                 | GAACGAAAGTGCCTCGGCCCTCTGCGGC               | IAA1a $\Delta$ ear<br>mutagenesis            |
| ear-R1                 | GCCGCAGGAGGGCCGAGGCACTTTCGTT               |                                              |
| ear-F2                 | GAATGGAACAGAGCAGCTGGCACTTGCCGAAAGGC        | IAA1a $\Delta$ ear<br>mutagenesis            |
| ear-R2                 | GCCTTTCGGCAAGTGC CAGCTGCTCTGTTCCATTC       |                                              |
| EF1 $\alpha$ -F        | ACGCGTTGTTGGCTTTCACCTTG                    | qPCR                                         |
| EF1 $\alpha$ -R        | GTGGTTGCGTCCATCTTGTTC                      | qPCR                                         |
| IAA1a-F                | ATCCGGGAGTCCGAGCTTC                        | qPCR                                         |
| IAA1a-R                | GGTTCTGCGCAGGAGGTG                         | qPCR                                         |
| IAA1b-F                | CGGTGGTCAGAATGGGTCA                        | qPCR                                         |
| IAA1b-R                | CCCACAGTCTGGTCTGCG                         | qPCR                                         |
| IAA2-F                 | TGCCTTGGGACTGGTTCATC                       | qPCR                                         |
| IAA2-R                 | CACAGCACCTTGGGCTTTCA                       | qPCR                                         |
| CBS-F                  | TTGGAAAGACCGCCAGCTATC                      | qPCR                                         |
| CBS-R                  | GCTCCGTTAAACTCTCAGAACCAC                   | qPCR                                         |
| Dox-F                  | AGCGATCCCACCAAATTCAGCTC                    | qPCR                                         |
| Dox-R                  | TGAACAACGTGGGCTCCAATCC                     | qPCR                                         |
| RSL4-F                 | TCAAACGGCCGAAACATCTACG                     | qPCR                                         |
| RSL4-R                 | CAGCTCCGCTCCTTTCAGAATATG                   | qPCR                                         |
